# Supplementary material for: Process Evaluation of a Prison Parenting Education Program for Women
Source: MDPI journal article supplement (doi:10.3390/socsci12070370), 2023-06-25
Supplement: s1 [file s1]

Archive with 1 entries (1 files):
- socsci-2284970-supplementary.pdf
