# Supplementary figures and images for: Process Evaluation of a Prison Parenting Education Program for Women
Source: MDPI journal article supplement (doi:10.3390/socsci12070370), 2023-06-25

Figure S1. Mothers Matter program logic.

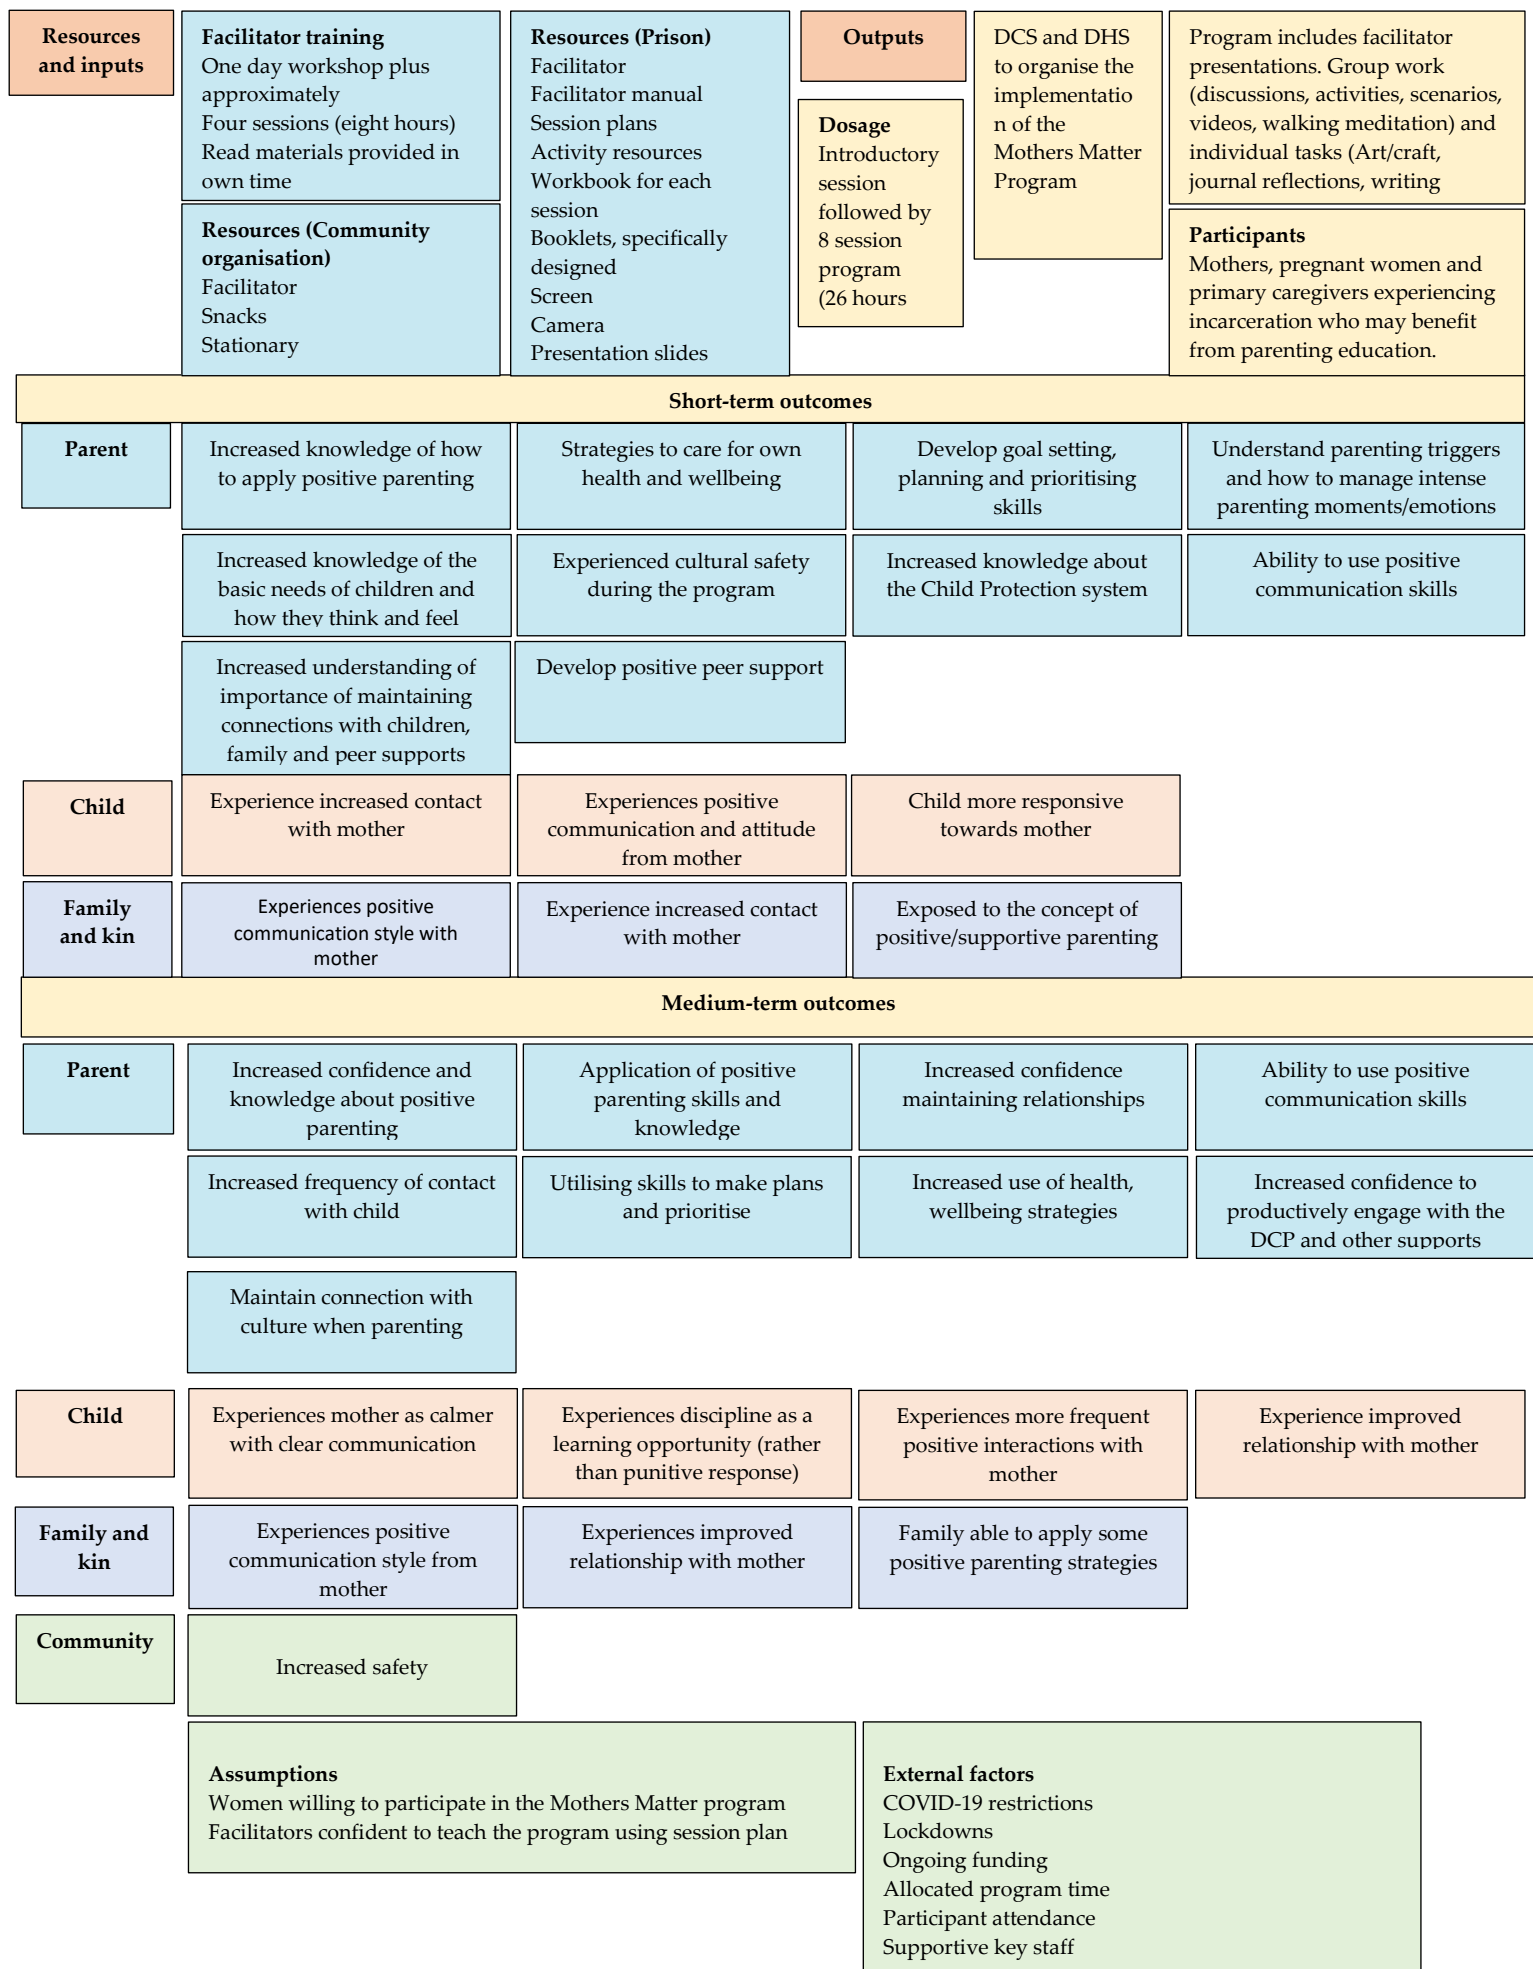

Supplement: s1 [file s1 › socsci-2284970-supplementary.pdf]
